# Supplementary material for: Rankings of Online Travel Agents, Channel Pricing, and Consumer Protection
Source: Atypon-hosted journal article supplement (doi:10.1287/mksc.2019.1167), 2020-01-01
Supplement: mksc.2019.1167.sm1.pdf [file mksc.2019.1167.sm1.pdf]

# Hotel Rankings of Online Travel Agents, Channel Pricing, and Consumer Protection

## Online Appendix

Matthias Hunold\*, Reinhold Kesler<sup>†</sup> and Ulrich Laitenberger<sup>‡</sup>

March 2019

---

\*Heinrich-Heine-Universität Düsseldorf, Düsseldorf Institute for Competition Economics (DICE), Universitätsstr. 1, 40225 Düsseldorf, Germany; hunold@dice.hhu.de.

<sup>†</sup>Centre for European Economic Research (ZEW), MaCCI Mannheim Centre for Competition and Innovation, Address: L7,1, 68161 Mannheim, Germany; kesler@zew.de.

<sup>‡</sup>Télécom ParisTech, 46 Rue Barrault, 75013 Paris, France, and ZEW (as above); laitenberger@enst.fr.

# 1 Appendix: Travel destinations in the dataset

Tables A1 until A5 show the travel destinations covered in our dataset which is as in Hunold et al. (2018) and further enriched by travel destinations in Switzerland. We include the 25 biggest German cities (Table A2), a control sample of 20 pairs of German and non-German cities along the German border (Table A3), and other countries for which we chose a composition of the 15 biggest cities and 15 most popular travel destinations with the objective to gather representative data across touristic and urban destinations for these countries.

Table A1: Countries covered in dataset

| Country     | Cities covered                                |
|-------------|-----------------------------------------------|
| Germany     | 25 biggest cities                             |
| Various     | 20 pairs of cities near German border         |
| Italy       | 15 biggest cities and 15 tourist destinations |
| Sweden      | 15 biggest cities and 14 tourist destinations |
| Canada      | 15 biggest cities and 15 tourist destinations |
| France      | 15 biggest cities and 15 tourist destinations |
| Austria     | 15 biggest cities and 15 tourist destinations |
| Switzerland | 16 biggest cities and 15 tourist destinations |

Table A2: Germany – Top 25 cities

| Germany Top 25 cities |            |           |           |               |
|-----------------------|------------|-----------|-----------|---------------|
| Berlin                | Stuttgart  | Leipzig   | Bochum    | Karlsruhe     |
| Hamburg               | Dusseldorf | Dresden   | Wuppertal | Mannheim      |
| Munich                | Dortmund   | Hanover   | Bielefeld | Augsburg      |
| Cologne               | Essen      | Nuremberg | Bonn      | Wiesbaden     |
| Frankfurt am Main     | Bremen     | Duisburg  | Munster   | Gelsenkirchen |

Table A3: Twin cities along German border

| Pair | German City            | Non-German neighbor | Neighbor country |
|------|------------------------|---------------------|------------------|
| 1    | Flensburg              | Kolding             | Denmark          |
| 2    | Puttgarden/Fehmarn     | Rodby               | Denmark          |
| 3    | Wilhelmshaven          | Groningen           | The Netherlands  |
| 4    | Borkum                 | Schiermonnikoog     | The Netherlands  |
| 5    | Rheine                 | Enschede            | The Netherlands  |
| 6    | Aachen                 | Maastricht          | The Netherlands  |
| 7    | Heringsdorf            | Wolin               | Poland           |
| 8    | Greifswald             | Stettin             | Poland           |
| 9    | Cottbus                | Zielona-Gora        | Poland           |
| 10   | Trier                  | Rosport             | Luxembourg       |
| 11   | Monschau               | Eupen               | Belgium          |
| 12   | Pruem                  | St. Vith            | Belgium          |
| 13   | Saarbrücken            | Metz                | France           |
| 14   | Karlsruhe              | Strasbourg          | France           |
| 15   | Freiburg               | Basel               | Switzerland      |
| 16   | Konstanz               | St. Gallen          | Switzerland      |
| 17   | Oberstdorf             | Bad Ischl           | Austria          |
| 18   | Garmisch-Partenkirchen | Innsbruck           | Austria          |
| 19   | Nuremberg              | Pilsen              | Czech Republic   |
| 20   | Dresden                | Prague              | Czech Republic   |

Table A4: Cities covered in dataset

| Italy                       | Canada                               | France                      | Sweden      | Austria                      | Switzerland          |
|-----------------------------|--------------------------------------|-----------------------------|-------------|------------------------------|----------------------|
| <i>Biggest Cities</i>       |                                      |                             |             |                              |                      |
| Rome                        | Toronto                              | Paris                       | Stockholm   | Vienna                       | Zürich               |
| Milan                       | Montreal                             | Marseille                   | Göteborg    | Graz                         | Genf                 |
| Naples                      | Vancouver                            | Lyon                        | Malmö       | Linz                         | Basel                |
| Turin                       | Calgary                              | Toulouse                    | Uppsala     | Salzburg                     | Lausanne             |
| Palermo                     | Edmonton                             | Nice                        | Västeras    | Innsbruck                    | Bern                 |
| Genoa                       | Ottawa                               | Nantes                      | Örebro      | Klagenfurt                   | Winterthur           |
| Bologna                     | Québec                               | Strasbourg                  | Linköping   | Villach                      | Luzern               |
| Florence                    | Winnipeg                             | Montpellier                 | Helsingborg | Wels                         | St. Gallen           |
| Bari                        | Hamilton                             | Bordeaux                    | Jönköping   | St. Pölten                   | Lugano               |
| Catania                     | Kitchener                            | Lille                       | Norrköping  | Dornbirn                     | Biel                 |
| Venice                      | London                               | Rennes                      | Lund        | Wiener<br>Neustadt           | Thun                 |
| Verona                      | Victoria                             | Reims                       | Umea        | Steyr                        | La<br>Chaux-de-Fonds |
| Messina                     | Saint Catharines                     | Le Havre                    | Gävle       | Feldkirch                    | Freiburg             |
| Padua                       | Halifax                              | Saint-Étienne               | Boras       | Bregenz                      | Schaffhausen         |
| Trieste                     | Oshawa                               | Toulon                      | Eskilstuna  | Leonding                     | Chur<br>Zermatt      |
| <i>Tourist Destinations</i> |                                      |                             |             |                              |                      |
| Lecce                       | Regina                               | Grenoble                    | Växjö       | Zell am See                  | Interlaken           |
| Viareggio                   | St. John's                           | Cannes                      | Lulea       | Kitzbühel                    | Davos                |
| Matera                      | Fredericton                          | Chambéry                    | Falun       | Bad Hofgastein               | St. Moritz           |
| Sanremo                     | Charlotte Town                       | Annecy                      | Varberg     | Hermagor                     | Grindelwald          |
| Mantova                     | Whitehorse                           | Aix-les-Bains               | Visby       | Schladming                   | Saas-Fee             |
| Vasto                       | Yellowknife                          | Menton                      | Ystad       | Mittelberg                   | Montreux             |
| Merano                      | Niagara On The<br>Lake               | Albertville                 | Kiruna      | Neustift                     | Dübendorf            |
| Caltagirone                 | Whistler                             | Bayeux                      | Strömstad   | Bad Gastein                  | Sarnen               |
| Montecatini<br>Terme        | Banff                                | Argelès-sur-Mer             | Ronneby     | Velden am<br>Wörther See     | Vitznau              |
| Narni                       | Jasper                               | Chamonix                    | Jokkmokk    | Finkenstein am<br>Faaker See | Ascona               |
| Abano Terme                 | Tofino                               | Évian-les-Bains             | Grebbestad  | Kirchberg in<br>Tirol        | Schwyz               |
| Ischia                      | Dawson City                          | Cavalaire-sur-<br>Mer       | Marstrand   | St. Kanzian                  | Delemont             |
| Monte<br>Argentario         | Churchill                            | Saint-Gervais-<br>les-Bains | Jukkasjärvi | Mayrhofen                    | Mendrisio            |
| San Felice<br>Circeo        | Bay of Fundy                         | Gruissan                    | Stöllet     | Seefeld in Tirol             | Martigny             |
| Santa<br>Margherita         | Thousand<br>Islands National<br>Park | Sainte-Marine               |             | Sölden                       | Ilanz                |

## Selection of travel destinations

For Italy, Sweden, Canada, France, Austria, and Switzerland we selected the travel destinations in two steps. First, we looked up the 15 biggest cities in terms of population on Wikipedia, respectively. Additionally, for each country, we collected information about popular tourist destinations from travel guides and official tourism websites. We then ordered all these destinations by population and again took the 15 biggest locations. For Italy, France, Sweden, and Canada the websites were all accessed in January and February 2016. The Austrian cities were selected in April 2016 after the Austrian competition authority announced proceedings against narrow PPCs later in 2016. In a similar vein, cities in Switzerland were chosen shortly before the beginning of the data collection in July 2016.

The sources of the travel destinations can be found in the following table:

Table A5: Sources for travel destination selection

| Country            | Type                                                          | Source                         |
|--------------------|---------------------------------------------------------------|--------------------------------|
| <i>Italy</i>       | Listing of health resorts                                     | wikipedia.de                   |
|                    | 10 most popular beaches                                       | telegraph.co.uk                |
|                    | Beyond Rome and Florence: 12 alternative Italian destinations | cnn.com                        |
|                    |                                                               |                                |
| <i>Sweden</i>      | Top 10 places in Sweden                                       | neverstoptraveling.com         |
|                    | Top 10 green Attractions                                      | visitsweden.com                |
| <i>Canada</i>      | Travelers Choice                                              | tripadvisor.com                |
|                    | Tourist attractions                                           | planetware.com                 |
|                    | Places to Go                                                  | de-keepexploring.canada.travel |
| <i>France</i>      | The top 10 beach holidays                                     | telegraph.co.uk                |
|                    | Travelers Choice Destinations                                 | tripadvisor.com                |
|                    | 16 top-rated tourist attractions in the French Alps           | planetware.com                 |
|                    |                                                               |                                |
| <i>Austria</i>     | Most popular winter destinations                              | austriatourism.at              |
|                    | Most popular summer destinations                              | austriatourism.at              |
| <i>Switzerland</i> | Most popular winter and summer destinations                   | myswitzerland.com              |

## 2 Appendix: Robustness checks

Table A6: Determinants of Booking.com's ranking – Additional Specifications

|                                          | (1)       | (2)      | (3)       | (4)      |
|------------------------------------------|-----------|----------|-----------|----------|
| Price at Booking/100                     | 4.92***   | 4.95***  | 4.92***   | 4.84***  |
| Preferred Partner                        | 74.80***  | 74.82*** | 74.81***  | 74.81*** |
| User Rating at Booking                   | -3.88*    | -3.86*   | -3.87*    | -3.90*   |
| # Bookings Last 3 Days                   | 0.01**    | 0.01**   | 0.01**    | 0.01**   |
| % Hotels Sold Out                        | 40.56***  | 40.53*** | 40.56***  | 40.57*** |
| Google Trends                            | -0.07***  | -0.07*** | -0.07***  | -0.07*** |
| (Booking-Direct)/Direct                  | -10.26*** |          |           |          |
| (Booking-Expedia)/Expedia                | -10.76*** |          |           |          |
| PPC x (Booking-Direct)/Direct            | 1.02      |          |           |          |
| PPC x (Booking-Expedia)/Expedia          | 4.28**    |          |           |          |
| Booking-Direct                           |           | -0.05*** |           |          |
| Booking-Expedia                          |           | -0.04*** |           |          |
| (Booking-Direct)/Direct > 0              |           |          | -10.51*** |          |
| (Booking-Expedia)/Expedia > 0            |           |          | -9.14***  |          |
| (Booking-Direct)/Direct < 0              |           |          | -7.48**   |          |
| (Booking-Expedia)/Expedia < 0            |           |          | -5.77***  |          |
| I[0 > (Booking-Direct)/Direct >= -0.1]   |           |          |           | 0.69*    |
| I[(Booking-Direct)/Direct < -0.1]        |           |          |           | 2.33***  |
| I[0 < (Booking-Direct)/Direct <= 0.1]    |           |          |           | 0.53     |
| I[(Booking-Direct)/Direct > 0.1]         |           |          |           | -1.48**  |
| I[0 > (Booking-Expedia)/Expedia >= -0.1] |           |          |           | -0.23    |
| I[(Booking-Expedia)/Expedia < -0.1]      |           |          |           | 2.01***  |
| I[0 < (Booking-Expedia)/Expedia <= 0.1]  |           |          |           | 0.06     |
| I[(Booking-Expedia)/Expedia > 0.1]       |           |          |           | -0.63*   |
| Channel Availability                     | Yes       | Yes      | Yes       | Yes      |
| Month FE                                 | Yes       | Yes      | Yes       | Yes      |
| Observations                             | 2307513   | 2307513  | 2307513   | 2307513  |
| $R^2$                                    | 0.91      | 0.91     | 0.91      | 0.91     |

Heteroscedasticity-robust standard errors not reported.

\*  $p < 0.1$ , \*\*  $p < 0.05$ , \*\*\*  $p < 0.01$

Table A7: Determinants of Expedia's ranking – Additional Specifications

|                                          | (1)       | (2)       | (3)       | (4)       |
|------------------------------------------|-----------|-----------|-----------|-----------|
| Price at Expedia/100                     | -11.50*** | -11.65*** | -11.52*** | -11.63*** |
| Sponsored Ad                             | 1.66*     | 1.73*     | 1.71*     | 1.71*     |
| User Rating at Expedia                   | 3.02**    | 3.19***   | 3.19***   | 3.12**    |
| # Bookings Last 2 Days                   | 0.66***   | 0.66***   | 0.66***   | 0.65***   |
| % Hotels Sold Out                        | 137.91*** | 138.10*** | 137.98*** | 138.08*** |
| Google Trends                            | 0.17***   | 0.17***   | 0.17***   | 0.17***   |
| (Expedia-Direct)/Direct                  | -58.05*** |           |           |           |
| (Expedia-Booking)/Booking                | -66.89*** |           |           |           |
| PPC x (Expedia-Direct)/Direct            | 50.16***  |           |           |           |
| PPC x (Expedia-Booking)/Booking          | 44.05***  |           |           |           |
| Expedia-Direct                           |           | -0.12***  |           |           |
| Expedia-Booking                          |           | -0.16***  |           |           |
| (Expedia-Direct)/Direct > 0              |           |           | -38.20*** |           |
| (Expedia-Booking)/Booking > 0            |           |           | -39.28*** |           |
| (Expedia-Direct)/Direct < 0              |           |           | -24.36*** |           |
| (Expedia-Booking)/Booking < 0            |           |           | -38.27*** |           |
| I[0 > (Expedia-Direct)/Direct >= -0.1]   |           |           |           | 0.11      |
| I[(Expedia-Direct)/Direct < -0.1]        |           |           |           | 6.92***   |
| I[0 < (Expedia-Direct)/Direct <= 0.1]    |           |           |           | -1.59*    |
| I[(Expedia-Direct)/Direct > 0.1]         |           |           |           | -10.12*** |
| I[0 > (Expedia-Booking)/Booking >= -0.1] |           |           |           | 2.32***   |
| I[(Expedia-Booking)/Booking < -0.1]      |           |           |           | 8.36***   |
| I[0 < (Expedia-Booking)/Booking <= 0.1]  |           |           |           | -2.14***  |
| I[(Expedia-Booking)/Booking > 0.1]       |           |           |           | -10.15*** |
| Channel Availability                     | Yes       | Yes       | Yes       | Yes       |
| Month FE                                 | Yes       | Yes       | Yes       | Yes       |
| Observations                             | 2457164   | 2457164   | 2457164   | 2457164   |
| $R^2$                                    | 0.92      | 0.92      | 0.92      | 0.92      |

Heteroscedasticity-robust standard errors not reported.

\*  $p < 0.1$ , \*\*  $p < 0.05$ , \*\*\*  $p < 0.01$

Table A8: Time structure of the reaction to deviations

|                                    | Booking.com |          |          | Expedia   |           |           |
|------------------------------------|-------------|----------|----------|-----------|-----------|-----------|
|                                    | (1)         | (2)      | (3)      | (4)       | (5)       | (6)       |
| Price at OTA/100                   | 6.69***     | 4.74***  | 4.73***  | -1.65*    | -6.81***  | -6.80***  |
| PPP/Sponsored Ad <sup>^</sup>      | 72.94***    | 61.46*** | 61.41*** | 2.20      | 2.11      | 1.84      |
| User Rating at OTA                 | -0.89       | -11.08   | -10.98   | -5.43     | 0.20      | -0.61     |
| # Past Bookings <sup>°</sup>       | 0.08***     | 0.04***  | 0.04***  | 0.50***   | 0.14**    | 0.13**    |
| \% Hotels Sold Out                 | 19.03***    | 19.33*** | 19.32*** | 134.49*** | 136.82*** | 136.45*** |
| Google Trends                      | 0.14***     | 0.03     | 0.03     | 0.31***   | 0.14*     | 0.14*     |
| (OTA-Direct)/Direct                | -10.87***   | -1.99    | -0.91    | -35.86*** | -32.34*** | -31.34*** |
| (OTA-(Other OTA))/(Other OTA)      | -4.17       | -7.01**  | -8.96*** | -38.38*** | -23.59*** | -18.16**  |
| Lag $t - 1$ - (Dev. on Direct)     |             |          | 0.21     |           |           | 0.44      |
| Lag $t - 2$ - (Dev. on Direct)     |             |          | -0.20    |           |           | -0.30     |
| Lag $t - 3$ - (Dev. on Direct)     |             |          | 2.19     |           |           | 3.76      |
| Lag $t - 4$ - (Dev. on Direct)     |             |          | -2.33    |           |           | -9.60**   |
| Lag $t - 5$ - (Dev. on Direct)     |             |          | -0.60    |           |           | 4.29      |
| Lag $t - 6$ - (Dev. on Direct)     |             |          | -0.28    |           |           | 0.28      |
| Lag $t - 7$ - (Dev. on Direct)     |             |          | -4.01*   |           |           | -2.07     |
| Lead $t + 1$ - (Dev. on Direct)    |             |          | -2.34    |           |           | -3.53     |
| Lead $t + 2$ - (Dev. on Direct)    |             |          | -1.83    |           |           | -6.86     |
| Lead $t + 3$ - (Dev. on Direct)    |             |          | -0.62    |           |           | -0.67     |
| Lead $t + 4$ - (Dev. on Direct)    |             |          | 0.55     |           |           | 1.16      |
| Lead $t + 5$ - (Dev. on Direct)    |             |          | -2.23    |           |           | 1.51      |
| Lead $t + 6$ - (Dev. on Direct)    |             |          | 0.19     |           |           | 10.34     |
| Lead $t + 7$ - (Dev. on Direct)    |             |          | -2.70    |           |           | 0.83      |
| Lag $t - 1$ - (Dev. on other OTA)  |             |          | 1.80     |           |           | -8.70     |
| Lag $t - 2$ - (Dev. on other OTA)  |             |          | 3.22     |           |           | -12.13*   |
| Lag $t - 3$ - (Dev. on other OTA)  |             |          | -1.10    |           |           | -17.88**  |
| Lag $t - 4$ - (Dev. on other OTA)  |             |          | -2.22    |           |           | -13.07*** |
| Lag $t - 5$ - (Dev. on other OTA)  |             |          | -1.41    |           |           | -13.13**  |
| Lag $t - 6$ - (Dev. on other OTA)  |             |          | 0.30     |           |           | -8.83     |
| Lag $t - 7$ - (Dev. on other OTA)  |             |          | 3.88     |           |           | -9.50     |
| Lead $t + 1$ - (Dev. on other OTA) |             |          | 4.62**   |           |           | 0.25      |
| Lead $t + 2$ - (Dev. on other OTA) |             |          | 3.94     |           |           | 4.51      |
| Lead $t + 3$ - (Dev. on other OTA) |             |          | 2.24     |           |           | 9.08      |
| Lead $t + 4$ - (Dev. on other OTA) |             |          | -1.48    |           |           | -9.99     |
| Lead $t + 5$ - (Dev. on other OTA) |             |          | 1.50     |           |           | 6.45      |
| Lead $t + 6$ - (Dev. on other OTA) |             |          | -1.35    |           |           | 1.33      |
| Lead $t + 7$ - (Dev. on other OTA) |             |          | 1.00     |           |           | -0.96     |
| Month FE                           | Yes         | Yes      | Yes      | Yes       | Yes       | Yes       |
| Observations                       | 146883      | 38697    | 38697    | 151397    | 44045     | 44045     |
| $R^2$                              | 0.91        | 0.95     | 0.95     | 0.84      | 0.87      | 0.87      |

Heteroscedasticity-robust standard errors not reported.

\*  $p < 0.1$ , \*\*  $p < 0.05$ , \*\*\*  $p < 0.01$

Notes: <sup>^</sup> For Booking.com, this is an indicator of whether the hotel is participating in the Preferred Partner Program, while for Expedia it indicates that the hotel had a sponsored advertisement. <sup>°</sup> Past Bookings are as reported from the respective OTA; for Booking.com, this is in the last three days, while for Expedia it is for the last two days.

### 3 Appendix: Price differentiation across channels

Table A9: Characteristics of hotels with lower prices on their websites than at Booking.com

|                            | (1)       | (2)       | (3)       | (4)      |
|----------------------------|-----------|-----------|-----------|----------|
| Average Price/100          | 2.77***   | 2.57***   | 2.57***   | 5.67***  |
| Preferred Partner          | -2.07     | -1.90     | -1.89     | -0.87    |
| Hotel Stars                | -1.63     | -1.60     | -1.60     |          |
| User Rating at Booking     | 0.44      | 0.45      | 0.45      | -3.57    |
| Number of User Ratings/100 | -0.08     | -0.03     | -0.03     |          |
| Number of Rooms/100        | -2.06**   | -1.96**   | -1.98**   |          |
| Chain Hotel                | -16.83*** | -16.79*** | -16.79*** |          |
| Google Trends              | 0.04*     | 0.05*     | 0.05**    | -0.00    |
| # Bookings Last 3 Days     |           | -0.04***  | -0.04***  | -0.01**  |
| % Hotels Sold Out          |           | 5.46***   | 4.27***   | 2.33***  |
| 7 days before              |           |           | -2.32***  | -2.21*** |
| 14 days before             |           |           | -2.06**   | -2.00*** |
| Month FE                   | Yes       | Yes       | Yes       | Yes      |
| FE                         | City      | City      | City      | Hotel    |
| Observations               | 375758    | 375758    | 375758    | 375758   |
| $R^2$                      | 0.11      | 0.11      | 0.11      | 0.46     |

Heteroscedasticity-robust standard errors not reported.

\*  $p < 0.1$ , \*\*  $p < 0.05$ , \*\*\*  $p < 0.01$

Table A10: Characteristics of hotels with lower prices at Expedia than at Booking.com

|                            | (1)      | (2)      | (3)      | (4)      |
|----------------------------|----------|----------|----------|----------|
| Average Price/100          | 0.31     | 0.29     | 0.28     | 0.05     |
| Preferred Partner          | 1.48***  | 1.53***  | 1.53***  | 1.00*    |
| Hotel Stars                | 1.21***  | 1.21***  | 1.21***  |          |
| User Rating at Booking     | -1.16*** | -1.18*** | -1.17*** | -1.10    |
| Number of User Ratings/100 | -0.04**  | -0.02    | -0.02    |          |
| Number of Rooms/100        | -0.38    | -0.33    | -0.32    |          |
| Chain Hotel                | -3.49*** | -3.48*** | -3.48*** |          |
| Google Trends              | -0.04*** | -0.04*** | -0.04*** | -0.01    |
| # Bookings Last 3 Days     |          | -0.02*** | -0.02*** | -0.01*** |
| % Hotels Sold Out          |          | 0.41     | 0.65     | 0.82***  |
| 7 days before              |          |          | 0.81***  | 0.60***  |
| 14 days before             |          |          | 0.04     | -0.11    |
| Month FE                   | Yes      | Yes      | Yes      | Yes      |
| FE                         | City     | City     | City     | Hotel    |
| Observations               | 1622767  | 1622767  | 1622767  | 1622767  |
| $R^2$                      | 0.07     | 0.07     | 0.07     | 0.34     |

Heteroscedasticity-robust standard errors not reported.

\*  $p < 0.1$ , \*\*  $p < 0.05$ , \*\*\*  $p < 0.01$

Table A11: Characteristics of hotels with lower prices on their websites than at Expedia

|                            | (1)       | (2)       | (3)       | (4)      |
|----------------------------|-----------|-----------|-----------|----------|
| Average Price/100          | 3.69***   | 3.36***   | 3.40***   | 5.17***  |
| Sponsored Ad               | -3.68*    | -3.62*    | -3.56*    | -0.44    |
| Hotel Stars                | -2.28     | -2.17     | -2.20     |          |
| User Rating at Expedia     | 0.00      | 0.16      | 0.13      | 0.06     |
| Number of User Ratings/100 | -0.18**   | -0.16*    | -0.16*    |          |
| Number of Rooms/100        | -1.46**   | -1.41**   | -1.43**   |          |
| Chain Hotel                | -17.41*** | -17.56*** | -17.56*** |          |
| Google Trends              | 0.02      | 0.01      | 0.02      | -0.01    |
| # Bookings Last 2 Days     |           | -0.09     | -0.08     | -0.00    |
| % Hotels Sold Out          |           | 14.52***  | 10.10***  | 8.89***  |
| 7 days before              |           |           | -3.33***  | -3.26*** |
| 14 days before             |           |           | -2.59**   | -2.46*** |
| Month FE                   | Yes       | Yes       | Yes       | Yes      |
| FE                         | City      | City      | City      | Hotel    |
| Observations               | 444470    | 444470    | 444470    | 444470   |
| $R^2$                      | 0.09      | 0.09      | 0.09      | 0.45     |

Heteroscedasticity-robust standard errors not reported.

\*  $p < 0.1$ , \*\*  $p < 0.05$ , \*\*\*  $p < 0.01$

Table A12: Characteristics of hotels with lower prices at Booking.com than at Expedia

|                            | (1)      | (2)      | (3)      | (4)      |
|----------------------------|----------|----------|----------|----------|
| Average Price/100          | -0.24    | -0.17    | -0.14    | -0.37**  |
| Sponsored Ad               | 0.27     | 0.28     | 0.30     | 0.13     |
| Hotel Stars                | -0.28    | -0.30    | -0.32    |          |
| User Rating at Expedia     | -2.96*** | -2.99*** | -3.01*** | -4.56**  |
| Number of User Ratings/100 | -0.02    | -0.02    | -0.02    |          |
| Number of Rooms/100        | -1.48*** | -1.46*** | -1.47*** |          |
| Chain Hotel                | -1.83*** | -1.84*** | -1.84*** |          |
| Google Trends              | 0.06     | 0.06     | 0.06     | 0.05***  |
| # Bookings Last 2 Days     |          | -0.02    | -0.02    | 0.03     |
| % Hotels Sold Out          |          | -3.58    | -5.43    | -3.51*** |
| 7 days before              |          |          | -1.18*** | -1.21*** |
| 14 days before             |          |          | -1.54*** | -1.66*** |
| Month FE                   | Yes      | Yes      | Yes      | Yes      |
| FE                         | City     | City     | City     | Hotel    |
| Observations               | 1554516  | 1554516  | 1554516  | 1554516  |
| $R^2$                      | 0.10     | 0.10     | 0.10     | 0.34     |

Heteroscedasticity-robust standard errors not reported.

\*  $p < 0.1$ , \*\*  $p < 0.05$ , \*\*\*  $p < 0.01$
